# Supplementary material for: Folic acid-functionalized up-conversion nanoparticles: toxicity studies in vivo and in vitro and targeted imaging applications
Source: Royal Society of Chemistry journal article supplement (doi:10.1039/c4nr02312a), 2014-01-01
Supplement: c4nr02312a1.pdf [file c4nr02312a1.pdf]

This updated ESI was republished on 01/09/2017 as the authors noticed an error in the supplied Fig. S3. Here, the correct image is given.

## Electronic Supplementary Information

### **Folic acid-functionalized upconversion nanoparticles: toxicity studies *in vivo* and *in vitro* and targeted imaging application**

**Lining Sun,<sup>\*a</sup> Zuwu Wei,<sup>a</sup> Haige Chen,<sup>\*b</sup> Jinliang Liu,<sup>a</sup> Jianjian Guo,<sup>c</sup> Ming Cao,<sup>b</sup>  
Tieqiao Wen<sup>c</sup> and Liyi Shi<sup>\*a</sup>**

<sup>a</sup> Research Center of Nano Science and Technology, Shanghai University, Shanghai 200444, P. R. China. E-mail: [lnsun@shu.edu.cn](mailto:lnsun@shu.edu.cn); [shiliyi@shu.edu.cn](mailto:shiliyi@shu.edu.cn); Tel: +86-21-66137153

<sup>b</sup> Department of Urology, Renji hospital, School of Medicine, Shanghai Jiao Tong University, Shanghai 200127, P. R. China. E-mail: [kirbyhaige@aliyun.com](mailto:kirbyhaige@aliyun.com)

<sup>c</sup> Laboratory of Molecular Neural Biology, School of Life Sciences, Shanghai University, Shanghai 200444, P. R. China.

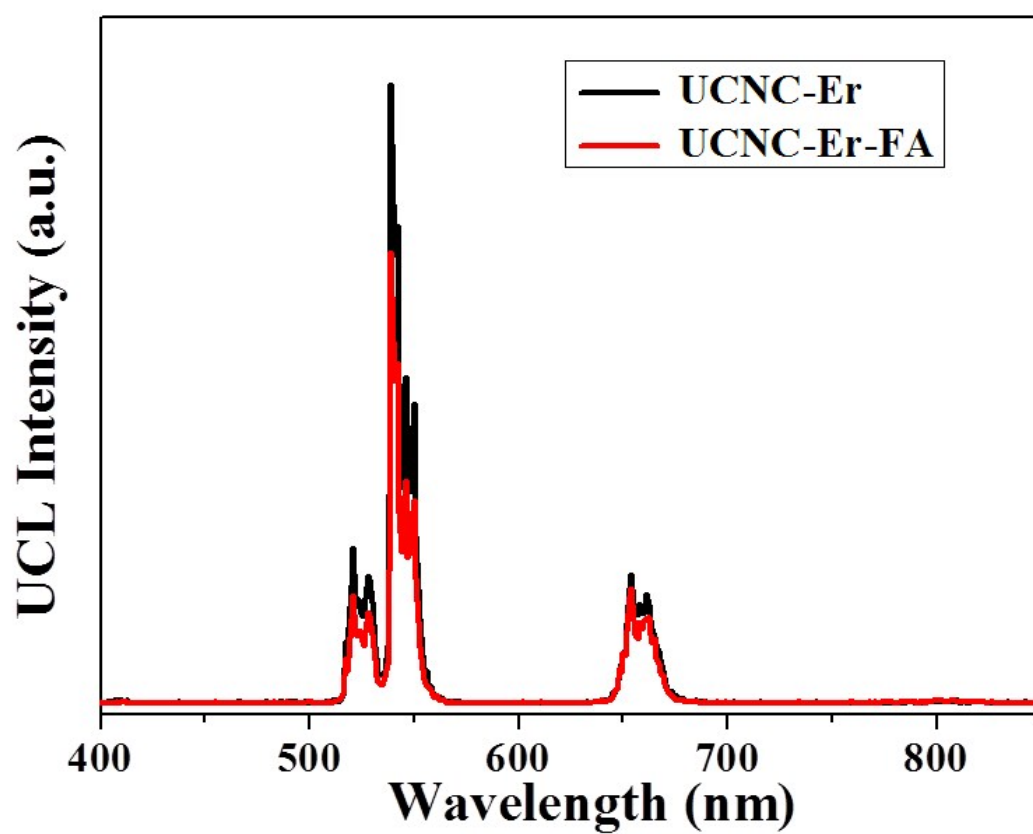

**Fig. S1** Upconversion luminescence spectra of UCNC-Er and UCNC-Er-FA under excitation of CW 980 nm light with a power of 2 W.

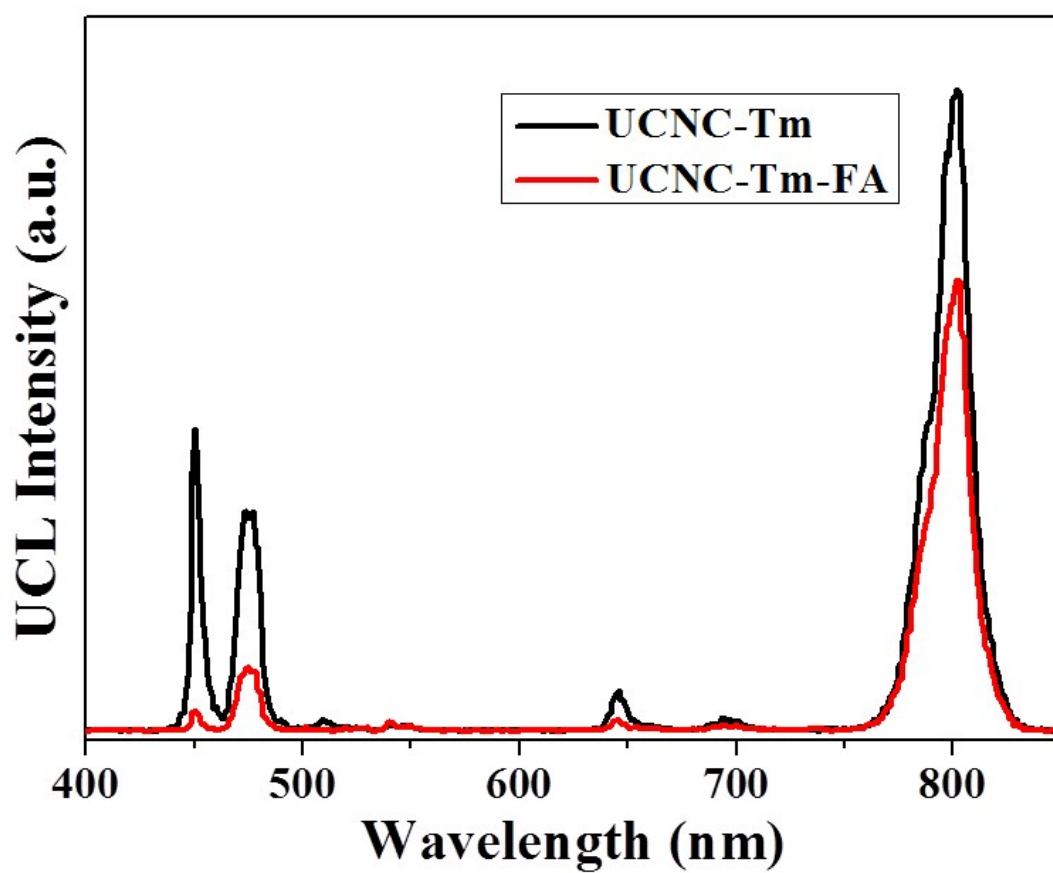

**Fig. S2** Upconversion luminescence spectra of UCNC-Tm and UCNC-Tm-FA under excitation of CW 980 nm light with a power of 2 W.

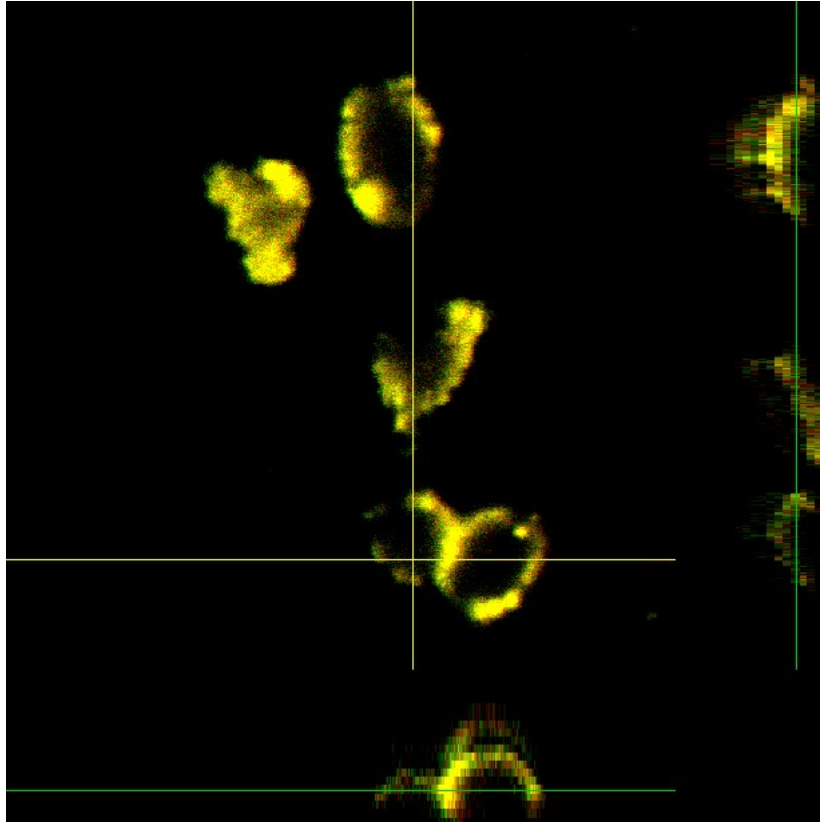

**Fig. S3** Confocal luminescence imaging data collected as a series along the Z optical axis.
